# Supplementary material for: Long-Term Changes in the Mortality Rates of Thyroid Cancer in Korea: Analysis of Korean National Data from 1985 to 2020
Source: PubMed Central journal article supplement — Endocrinol Metab (Seoul). 2023 Sep 8;38(5):588–95. doi: 10.3803/EnM.2023.1723 (PMC10613776; doi:10.3803/enm.2023.1723), 2023-09-08
Supplement: enm-2023-1723-Supplemental-Fig-S1.pdf [file enm-2023-1723-Supplemental-Fig-S1.pdf]

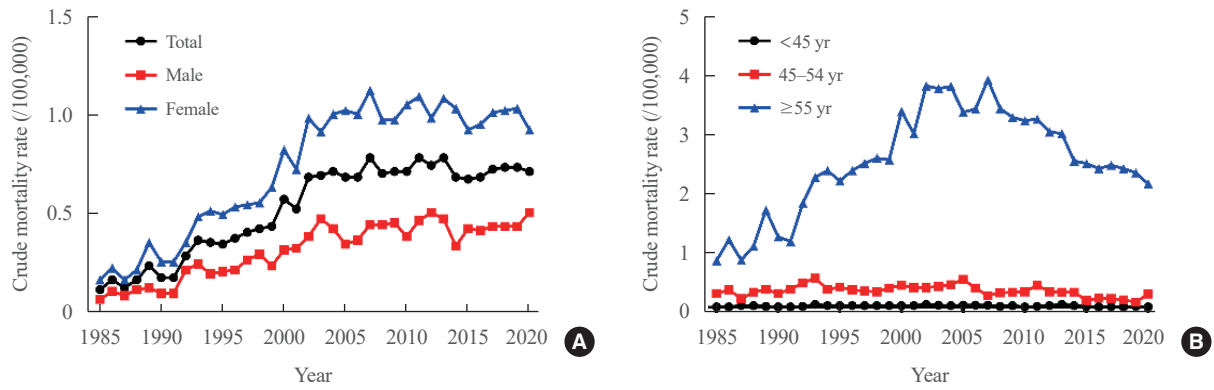

**Supplemental Fig. S1.** Crude mortality rates of thyroid cancer in Korea. (A) Overall and according to sex, (B) according to age.
