# Supplementary material for: Long-Term Changes in the Mortality Rates of Thyroid Cancer in Korea: Analysis of Korean National Data from 1985 to 2020
Source: PubMed Central journal article supplement — Endocrinol Metab (Seoul). 2023 Sep 8;38(5):588–95. doi: 10.3803/EnM.2023.1723 (PMC10613776; doi:10.3803/enm.2023.1723), 2023-09-08
Supplement: enm-2023-1723-Supplemental-Table-S1.pdf [file enm-2023-1723-Supplemental-Table-S1.pdf]

**Supplemental Table S1.** Crude Mortality Rates (per 100,000) of Thyroid Cancer from 1985 to 2020 in Korea

| Year | Total | Male | Female | <45 yr | 45–54 yr | ≥55 yr |
|------|-------|------|--------|--------|----------|--------|
| 1985 | 0.11  | 0.06 | 0.16   | 0.01   | 0.24     | 0.80   |
| 1986 | 0.16  | 0.10 | 0.22   | 0.01   | 0.30     | 1.16   |
| 1987 | 0.12  | 0.08 | 0.16   | 0.03   | 0.15     | 0.81   |
| 1988 | 0.16  | 0.11 | 0.21   | 0.03   | 0.26     | 1.05   |
| 1989 | 0.23  | 0.12 | 0.35   | 0.02   | 0.31     | 1.67   |
| 1990 | 0.17  | 0.09 | 0.25   | 0.01   | 0.24     | 1.21   |
| 1991 | 0.17  | 0.09 | 0.25   | 0.01   | 0.31     | 1.13   |
| 1992 | 0.28  | 0.21 | 0.35   | 0.02   | 0.42     | 1.79   |
| 1993 | 0.36  | 0.24 | 0.48   | 0.05   | 0.50     | 2.23   |
| 1994 | 0.35  | 0.19 | 0.51   | 0.03   | 0.31     | 2.35   |
| 1995 | 0.34  | 0.20 | 0.49   | 0.03   | 0.35     | 2.17   |
| 1996 | 0.37  | 0.21 | 0.53   | 0.03   | 0.30     | 2.35   |
| 1997 | 0.40  | 0.26 | 0.54   | 0.03   | 0.28     | 2.47   |
| 1998 | 0.42  | 0.29 | 0.55   | 0.03   | 0.27     | 2.56   |
| 1999 | 0.43  | 0.23 | 0.63   | 0.03   | 0.33     | 2.53   |
| 2000 | 0.57  | 0.31 | 0.82   | 0.03   | 0.38     | 3.36   |
| 2001 | 0.52  | 0.32 | 0.72   | 0.03   | 0.34     | 2.98   |
| 2002 | 0.68  | 0.38 | 0.98   | 0.05   | 0.34     | 3.80   |
| 2003 | 0.69  | 0.47 | 0.91   | 0.04   | 0.36     | 3.75   |
| 2004 | 0.71  | 0.42 | 1.00   | 0.03   | 0.39     | 3.79   |
| 2005 | 0.68  | 0.34 | 1.02   | 0.04   | 0.48     | 3.35   |
| 2006 | 0.68  | 0.36 | 1.00   | 0.04   | 0.33     | 3.40   |
| 2007 | 0.78  | 0.44 | 1.12   | 0.04   | 0.20     | 3.90   |
| 2008 | 0.70  | 0.44 | 0.97   | 0.02   | 0.25     | 3.41   |
| 2009 | 0.71  | 0.45 | 0.97   | 0.03   | 0.26     | 3.26   |
| 2010 | 0.71  | 0.38 | 1.05   | 0.01   | 0.27     | 3.20   |
| 2011 | 0.78  | 0.46 | 1.09   | 0.02   | 0.38     | 3.23   |
| 2012 | 0.74  | 0.50 | 0.98   | 0.03   | 0.27     | 3.01   |
| 2013 | 0.78  | 0.47 | 1.08   | 0.05   | 0.26     | 2.98   |
| 2014 | 0.68  | 0.33 | 1.03   | 0.03   | 0.26     | 2.51   |
| 2015 | 0.67  | 0.42 | 0.92   | 0.02   | 0.12     | 2.47   |
| 2016 | 0.68  | 0.41 | 0.95   | 0.01   | 0.16     | 2.38   |
| 2017 | 0.72  | 0.43 | 1.01   | 0.01   | 0.15     | 2.44   |
| 2018 | 0.73  | 0.43 | 1.02   | 0.01   | 0.13     | 2.38   |
| 2019 | 0.73  | 0.43 | 1.03   | 0.02   | 0.09     | 2.31   |
| 2020 | 0.71  | 0.50 | 0.92   | 0.01   | 0.23     | 2.12   |
